# Supplementary material for: Identification of potential nucleomodulins of Mycoplasma bovis by direct biotinylation and proximity-based biotinylation approaches
Source: Front Microbiol. 2024 Jul 9;15:1421585. doi: 10.3389/fmicb.2024.1421585 (PMC11263210; doi:10.3389/fmicb.2024.1421585)
Supplement: Supplementary file 4 [file Table_2.XLSX]

## Sheet: Sheet1
Table S2. M. bovis Proteins identified using the DB approach combined with LC-MS/MS
Accession	Description	Mw(kDa)	Peptides	Unique peptides	Sequence coverage [%]	Unique sequence coverage [%]	MS/MS count	Intensity	log2 intensity	iBAQ	iBAQ [%]
Mbov_0016	Mbov_0016 P48-like surface lipoprotein 14369:15775 reverse MW:51159	51.159	22	22	48.5	48.5	37	5760800000	32.4236	198650000	9.718
Mbov_0103	pdhB pyruvate dehydrogenase E1 component subunit beta 112885:113871 forward MW:36001	36.001	10	10	29.9	29.9	16	2490100000	31.2136	146470000	7.166
Mbov_0579	Mbov_0579 membrane lipoprotein P81 683802:685988 forward MW:81603	81.602	39	39	52.9	52.9	64	6615000000	32.6231	137810000	6.742
Mbov_0102	pdhA pyruvate dehydrogenase E1 component subunit alpha 111757:112848 forward MW:41303	41.302	12	12	35	35	23	1866900000	30.798	77787000	3.805
Mbov_0798	Mbov_0798 variable surface lipoprotein VspHB0801-6 930971:931804 reverse MW:30425	30.425	7	7	36.8	36.8	6	1294200000	30.2694	53926000	2.638
Mbov_0599	Mbov_0599 30S ribosomal protein 705053:705424 reverse MW:13951	13.951	5	5	37.4	37.4	4	320280000	28.2548	45755000	2.238
Mbov_0564	Mbov_0564 predicted permeases 665633:666877 reverse MW:44966	44.965	6	6	11.8	11.8	8	629170000	29.2289	44941000	2.199
Mbov_0580	Mbov_0580 nuclease 686053:687222 forward MW:44208	44.208	17	17	48.1	48.1	26	1156400000	30.107	41301000	2.021
Mbov_0106	pdhD dihydrolipoamide dehydrogenase 114968:116581 forward MW:58100	58.099	15	15	29.8	29.8	26	1318400000	30.2961	41200000	2.016
Mbov_0481	ef-TU elongation factor 561381:562571 reverse MW:43551	43.55	13	13	40.7	40.7	22	1086000000	30.0164	40223000	1.968
Mbov_0570	Mbov_0570 putative lipoprotein 672007:674271 forward MW:85528	85.526	30	30	40.1	40.1	48	1857300000	30.7906	37905000	1.854
Mbov_0280	Mbov_0280 predicted lipoprotein 322382:323401 forward MW:37540	37.54	20	20	49.6	49.6	24	851450000	29.6653	34058000	1.666
Mbov_0521	Mbov_0521 putative transmembrane protein 615836:617083 forward MW:48246	48.245	18	18	42.9	42.9	21	833620000	29.6348	33345000	1.631
Mbov_0312	adh alcohol dehydrogenase 368079:369131 forward MW:37581	37.581	10	10	41.1	41.1	10	612620000	29.1904	30631000	1.499
Mbov_0739	Mbov_0739 putative lipoprotein 871506:873359 reverse MW:69999	69.998	26	26	48	48	36	1218000000	30.1819	29708000	1.453
Mbov_0275	Mbov_0275 putative membrane lipoprotein 315473:316540 reverse MW:40083	40.083	14	14	43.4	43.4	17	722580000	29.4286	27791000	1.36
Mbov_0581	Mbov_0581 multiple sugar ABC transporter ATP-binding protein 687231:689333 forward MW:80192	80.19	31	31	42	42	36	1328600000	30.3073	27679000	1.354
Mbov_0194	Mbov_0194 putative transmembrane protein 227307:228326 forward MW:39013	39.012	12	12	30.4	30.4	13	606460000	29.1758	26368000	1.29
Mbov_0299	Mbov_0299 NADH oxidase 349321:350685 reverse MW:49819	49.819	12	12	25.8	25.8	16	656490000	29.2902	26260000	1.285
Mbov_0712	Mbov_0712 50S ribosomal protein 843830:844180 forward MW:13469	13.469	3	3	20.7	20.7	4	182100000	27.4402	26014000	1.273
Mbov_0314	Mbov_0314 30S ribosomal protein 371498:371935 forward MW:16658	16.658	5	5	34.5	34.5	5	151500000	27.1747	25249000	1.235
Mbov_0619	Mbov_0619 50S ribosomal protein 729329:729697 reverse MW:13213	13.213	6	6	41.8	41.8	6	286860000	28.0958	23905000	1.169
Mbov_0116	Mbov_0116 putative lipoprotein 129414:130400 forward MW:37375	37.375	14	14	46.6	46.6	14	466530000	28.7974	22216000	1.087
Mbov_0222	tpx Thiol peroxidase 255034:255519 forward MW:18371	18.371	3	3	26.1	26.1	3	247350000	27.882	20612000	1.008
Mbov_0582	Mbov_0582 multiple sugar ABC transporter permease protein 689317:690384 forward MW:39555	39.554	6	6	17.2	17.2	10	306410000	28.1909	20427000	0.999
Mbov_0623	Mbov_0623 30S ribosomal protein 730589:731239 reverse MW:24221	24.221	6	6	25.9	25.9	4	301650000	28.1683	18853000	0.922
Mbov_0130	Mbov_0130 putative transmembrane protein 144203:144901 forward MW:26403	26.403	6	6	35.3	35.3	8	319300000	28.2503	18782000	0.919
Mbov_0274	Mbov_0274 putative lipoprotein 313664:315433 forward MW:66471	66.47	22	22	40.4	40.4	26	783670000	29.5457	18225000	0.892
Mbov_0595	Mbov_0595 cobalt/nickel ABC transporter ATP-binding protein 702265:703062 reverse MW:29319	29.319	8	8	29.1	29.1	9	286160000	28.0922	17885000	0.875
Mbov_0062	gapA glyceraldehyde 3-phosphate dehydrogenase 70760:71770 reverse MW:36747	36.747	11	11	38.7	38.7	12	366590000	28.4496	17456000	0.854
Mbov_0015	Mbov_0015 putative transmembrane protein 13515:14318 forward MW:30660	30.66	1	1	4.5	4.5	1	111200000	26.7286	15886000	0.777
Mbov_0019	Mbov_0019 sugar ABC transporter permease 18060:20048 forward MW:74309	74.308	10	10	16.8	16.8	11	504340000	28.9098	14833000	0.726
Mbov_0217	Mbov_0217 predicted lipoprotein 251828:253210 forward MW:53480	53.479	22	22	45.9	45.9	20	470300000	28.809	14697000	0.719
Mbov_0626	Mbov_0626 50S ribosomal protein 731867:732712 reverse MW:30688	30.687	4	4	16	16	4	172190000	27.3594	14349000	0.702
Mbov_0216	Mbov_0216 putative transmembrane protein 249648:251816 forward MW:82740	82.739	26	26	35.9	35.9	26	720780000	29.425	14133000	0.691
Mbov_0760	Mbov_0760 putative transmembrane protein 895374:896432 reverse MW:40530	40.53	9	9	30.4	30.4	9	330900000	28.3018	13788000	0.675
Mbov_0440	atpA ATP synthase subunit alpha 511519:513105 reverse MW:57765	57.764	13	11	25.9	22.9	16	407720000	28.603	13591000	0.665
Mbov_0511	Mbov_0511 conserved hypothetical protein 597991:598443 reverse MW:17403	17.403	3	3	16	16	3	73480000	26.1308	12247000	0.599
Mbov_0020	Mbov_0020 sugar ABC transporter permease 20048:21025 forward MW:34674	34.674	2	2	9.8	9.8	2	107800000	26.6838	11978000	0.586
Mbov_0594	Mbov_0594 cobalt/nickel ABC transporter ATP-binding protein 701336:702274 reverse MW:35477	35.476	9	9	27.9	27.9	9	245400000	27.8706	11686000	0.572
Mbov_0628	Mbov_0628 50S ribosomal protein 733222:734202 reverse MW:35284	35.284	5	5	14.4	14.4	4	265690000	27.9852	11552000	0.565
Mbov_0672	Mbov_0672 putative membrane lipoprotein 784918:785814 forward MW:34328	34.327	2	2	5	5	3	111250000	26.7292	11125000	0.544
Mbov_0306	phnD phosphonate ABC transporter substrate-binding protein 360891:362246 forward MW:51517	51.517	10	10	23.7	23.7	9	259120000	27.949	10797000	0.528
Mbov_0675	cpdB 5nucleotidase 788678:790720 reverse MW:76062	76.061	24	24	35.4	35.4	21	461970000	28.7832	10743000	0.526
Mbov_0129	Mbov_0129 putative transmembrane protein 142291:144108 forward MW:69667	69.666	12	12	18.8	18.8	14	348790000	28.3778	10569000	0.517
Mbov_0225	Mbov_0225 hypothetical protein 256916:257200 reverse MW:11488	11.488	4	4	38.3	38.3	4	73424000	26.1297	10489000	0.513
Mbov_0791	Mbov_0791 putative transmembrane protein 924391:925398 forward MW:37793	37.792	5	5	13.7	13.7	5	111590000	26.7336	10144000	0.496
Mbov_0699	Mbov_0699 putative lipoprotein 829285:830010 forward MW:27120	27.12	7	7	35.7	35.7	8	143850000	27.1	9590100	0.469
Mbov_0542	acpD acyl carrier protein phosphodiesterase 639745:640347 reverse MW:22389	22.389	3	3	14	14	3	95810000	26.5137	9581000	0.469
Mbov_0111	Mbov_0111 putative lipoprotein 120540:123425 forward MW:110129	110.13	24	24	27.7	27.7	22	617050000	29.2008	9209700	0.451
Mbov_0316	Mbov_0316 30S ribosomal protein 372395:372721 forward MW:12029	12.029	3	3	35.2	35.2	3	69695000	26.0546	8711900	0.426
Mbov_0338	adh alcohol dehydrogenase 399768:400829 forward MW:38473	38.473	11	11	32.9	32.9	11	181050000	27.4318	8621600	0.422
Mbov_0126	pepP XAA-Pro aminopeptidase 139144:140193 forward MW:39683	39.683	7	7	18.6	18.6	8	176400000	27.3943	8400200	0.411
Mbov_0839	lacI LacI family transcriptional regulator 970406:971365 reverse MW:36994	36.994	7	7	19.1	19.1	7	181390000	27.4345	8245200	0.403
Mbov_0438	atpD ATP synthase subunit beta 509147:510610 reverse MW:53459	53.458	14	14	43.5	43.5	17	221530000	27.7229	8204800	0.401
Mbov_0583	Mbov_0583 multiple sugar ABC transporter permease protein 690323:691306 forward MW:37591	37.59	4	4	11.3	11.3	3	146780000	27.1291	8154600	0.399
Mbov_0618	Mbov_0618 50S ribosomal protein 728990:729316 reverse MW:12078	12.078	2	2	21.3	21.3	3	48145000	25.5209	8024200	0.393
Mbov_0326	Mbov_0326 predicted secreted acid phosphatase 385323:386714 reverse MW:52715	52.714	7	7	11.2	11.2	7	190270000	27.5035	7927900	0.388
Mbov_0475	Mbov_0475 putative lipoprotein 555413:556519 reverse MW:42248	42.248	10	10	28.8	28.8	10	204380000	27.6067	7860700	0.385
Mbov_0571	Mbov_0571 hexosephosphate transport protein 674569:676035 forward MW:53736	53.735	5	5	10	10	5	125180000	26.8994	7823500	0.383
Mbov_0644	Mbov_0644 30S ribosomal protein 745118:745714 reverse MW:22551	22.551	4	4	16.2	16.2	3	116480000	26.7955	7280100	0.356
Mbov_0593	Mbov_0593 cobalt/nickel ABC transporter permease protein 700441:701346 reverse MW:35075	35.075	6	6	20.6	20.6	7	158050000	27.2358	7184100	0.351
Mbov_0204	Mbov_0204 putative transmembrane protein 239537:239992 forward MW:17328	17.328	1	1	6	6	2	48267000	25.5245	6895300	0.337
Mbov_0154	Mbov_0154 putative transmembrane protein 174287:175783 forward MW:56897	56.896	14	14	31.1	31.1	16	196780000	27.552	6785500	0.332
Mbov_0585	Mbov_0585 putative lipoprotein 691608:693146 forward MW:59658	59.657	12	12	24.4	24.4	13	250480000	27.9001	6591600	0.322
Mbov_0629	Mbov_0629 50S ribosomal protein 734202:735032 reverse MW:29663	29.663	6	6	27.9	27.9	7	109750000	26.7096	6456000	0.316
Mbov_0006	Mbov_0006 esterase/lipase 6195:6980 forward MW:30711	30.711	7	7	24.5	24.5	5	113860000	26.7627	6325500	0.309
Mbov_0131	Mbov_0131 phosphoketolase 145083:147470 forward MW:89943	89.941	15	15	17.9	17.9	15	307530000	28.1962	6276200	0.307
Mbov_0436	Mbov_0436 putative membrane lipoprotein 507671:508582 reverse MW:35132	35.131	2	2	6.9	6.9	2	75224000	26.1647	6268600	0.307
Mbov_0640	mscL large conductance mechanosensitive channel 742088:742510 reverse MW:15380	15.38	2	2	22.1	22.1	3	37273000	25.1516	6212200	0.304
Mbov_0509	atpA ATPase subunit alpha 594132:595706 reverse MW:59123	59.122	9	7	17.6	14.5	9	173570000	27.3709	6198800	0.303
Mbov_0115	oppF oligopeptide ABC transporter ATP-binding protein 126999:129401 forward MW:93975	93.974	19	19	23.4	23.4	17	297340000	28.1475	5946800	0.291
Mbov_0294	rpsB 30S ribosomal protein 342696:343649 forward MW:35519	35.518	5	5	24.3	24.3	4	123120000	26.8755	5863000	0.287
Mbov_0698	Mbov_0698 50S ribosomal protein 828299:828802 reverse MW:18400	18.4	4	4	25.1	25.1	4	45803000	25.4489	5725400	0.28
Mbov_0604	secY preprotein translocase subunit secY 707217:708695 reverse MW:54888	54.887	4	4	6.3	6.3	4	131400000	26.9694	5712900	0.279
Mbov_0453	Mbov_0453 putative transmembrane protein 525044:525799 forward MW:28990	28.99	2	2	6.8	6.8	3	56395000	25.7491	5639500	0.276
Mbov_0369	deoD purine-nucleoside phosphorylase 435514:436242 reverse MW:27005	27.005	3	3	12.8	12.8	3	89040000	26.408	5565000	0.272
Mbov_0637	Mbov_0637 50S ribosomal protein 740951:741229 reverse MW:10143	10.143	2	2	26.1	26.1	2	32777000	24.9662	5462900	0.267
Mbov_0612	Mbov_0612 30S ribosomal protein 726235:726930 reverse MW:25313	25.313	5	5	23.4	23.4	6	81118000	26.2735	5407900	0.265
Mbov_0100	trxB thioredoxin reductase 109820:110743 forward MW:33697	33.696	8	7	27	25.1	7	108570000	26.6941	5170000	0.253
Mbov_0099	lgt sialyltransferase 108835:109818 forward MW:37882	37.882	5	5	17.1	17.1	6	81545000	26.2811	5096600	0.249
Mbov_0051	pyrH uridylate kinase 60339:61061 forward MW:26341	26.341	4	4	20.4	20.4	4	71232000	26.086	5088000	0.249
Mbov_0324	glpF glycerol uptake facilitator protein 382725:383516 reverse MW:28052	28.052	1	1	4.2	4.2	1	28004000	24.7391	4667400	0.228
Mbov_0018	Mbov_0018 simple sugar ABC transporter ATP-binding protein.P59-like protein 16463:18067 forward MW:59309	59.308	11	11	21.2	21.2	12	156000000	27.217	4588100	0.224
Mbov_0089	Mbov_0089 50S ribosomal protein 101451:102146 forward MW:24986	24.986	8	8	35.9	35.9	6	71120000	26.0838	4445000	0.217
Mbov_0723	ulaA ascorbate-specific PTS system enzyme II Acomponent 854545:856353 reverse MW:63932	63.931	7	7	14.5	14.5	8	74273000	26.1463	4369000	0.214
Mbov_0305	Mbov_0305 putative transmembrane protein 358653:360440 reverse MW:68719	68.718	10	10	23.9	23.9	11	139480000	27.0555	4358700	0.213
Mbov_0056	gpsA glycerol-3-phosphate dehydrogenase 66024:67022 reverse MW:36914	36.914	7	7	20.2	20.2	7	90250000	26.4274	4297600	0.21
Mbov_0569	Mbov_0569 transmembrane protein 671045:671950 forward MW:34016	34.015	3	3	8	8	2	46353000	25.4662	4213900	0.206
Mbov_0613	Mbov_0613 50S ribosomal protein 726933:727283 reverse MW:12898	12.898	2	2	17.2	17.2	2	37534000	25.1617	4170400	0.204
Mbov_0780	pgsA CDP-diacylglycerol--glycerol-3-phosphate 3-phosphatidyltransferas 913451:914059 forward MW:22904	22.904	2	2	9.4	9.4	2	49319000	25.5556	4109900	0.201
Mbov_0510	Mbov_0510 putative transmembrane protein 595710:597989 reverse MW:85236	85.235	15	15	19.5	19.5	13	208810000	27.6376	4094300	0.2
Mbov_0495	mgte Mg2 transport protein 577592:579052 reverse MW:54141	54.14	4	4	9.5	9.5	5	82928000	26.3054	3949000	0.193
Mbov_0643	Mbov_0643 50S ribosomal protein 744883:745095 reverse MW:7751	7.7509	2	2	35.7	35.7	2	15380000	23.8746	3845000	0.188
Mbov_0113	oppC oligopeptide ABC transporter permease protein 124578:125846 forward MW:47402	47.401	5	5	10.4	10.4	5	87915000	26.3896	3516600	0.172
Mbov_0514	Mbov_0514 putative transmembrane protein 599844:601361 reverse MW:58146	58.145	3	3	6.1	6.1	4	69292000	26.0462	3464600	0.169
Mbov_0439	atpG ATP synthase subunit gamma 510663:511526 reverse MW:32823	32.822	6	6	24	24	6	65325000	25.9611	3438200	0.168
Mbov_0104	Mbov_0104 hypothetical protein 114008:114232 forward MW:8148	8.1482	1	1	10.8	10.8	1	13543000	23.691	3385700	0.166
Mbov_0678	Mbov_0678 30S ribosomal protein 793510:793923 reverse MW:15093	15.093	2	2	19	19	2	29905000	24.8339	3322700	0.163
Mbov_0112	oppB oligopeptide ABC transporter permease protein 123457:124578 forward MW:41863	41.863	4	4	14.5	14.5	5	49078000	25.5486	3271900	0.16
Mbov_0067	yidC preprotein translocase subunit 75073:77238 forward MW:83856	83.855	16	16	28.2	28.2	14	122550000	26.8688	3142300	0.154
Mbov_0310	secA preprotein translocase subunit SecA 365329:367848 reverse MW:96339	96.337	10	10	13.3	13.3	10	166080000	27.3073	3075600	0.15
Mbov_0688	Mbov_0688 ATP-binding cassette subfamily B 803966:805810 reverse MW:69084	69.082	8	8	15.5	15.5	9	109920000	26.7119	3053300	0.149
Mbov_0614	Mbov_0614 50S ribosomal protein 727308:727847 reverse MW:19385	19.384	3	3	21.8	21.8	3	27475000	24.7116	3052700	0.149
Mbov_0114	oppD oligopeptide ABC transporter ATP-binding protein 125861:127009 forward MW:43319	43.318	2	2	7.9	7.9	1	57297000	25.772	3015600	0.148
Mbov_0328	Mbov_0328 exopolyphosphatase-related proteins 387850:388818 reverse MW:36457	36.457	7	7	22.7	22.7	8	69698000	26.0546	2904100	0.142
Mbov_0767	Mbov_0767 conserved hypothetical protein 900598:902271 reverse MW:62866	62.864	8	8	15.4	15.4	8	91955000	26.4544	2873600	0.141
Mbov_0027	Mbov_0027 predicted Hydrolase of the HAD superfamily 26773:27603 forward MW:31104	31.104	4	4	13.8	13.8	3	46379000	25.467	2576600	0.126
Mbov_0097	Mbov_0097 putative transmembrane protein 107353:107742 forward MW:15167	15.167	2	2	14	14	2	15466000	23.8826	2577700	0.126
Mbov_0070	Mbov_0070 putative transmembrane protein 79283:80047 forward MW:29190	29.19	1	1	4.7	4.7	1	18003000	24.1017	2571800	0.126
Mbov_0321	hisS histidyl-tRNA synthetase 378210:379526 forward MW:50393	50.392	7	7	21.5	21.5	8	78851000	26.2326	2543600	0.124
Mbov_0845	ftsH cell division protease 985723:987753 reverse MW:75242	75.241	6	6	10.1	10.1	7	118870000	26.8248	2529200	0.124
Mbov_0265	secDF SecD/SecF fusion protein 303994:306360 forward MW:89216	89.214	8	8	11.8	11.8	10	108310000	26.6906	2461600	0.12
Mbov_0589	deoA thymidine phosphorylase 696426:697721 forward MW:47079	47.078	8	8	20	20	8	73249000	26.1263	2441600	0.119
Mbov_0137	potD spermidine/putrescine-binding periplasmic protein 154159:156060 forward MW:73515	73.514	6	6	10.7	10.7	6	90136000	26.4256	2436100	0.119
Mbov_0784	if-2 translation initiation factor 916403:918208 reverse MW:66670	66.669	12	12	26.6	26.6	11	90878000	26.4374	2330200	0.114
Mbov_0136	potC spermidine/putrescine ABC transporter permease 153279:154172 forward MW:33191	33.19	1	1	3.7	3.7	1	25621000	24.6108	2329200	0.114
Mbov_0783	apt adenine phosphoribosyltransferase 915862:916374 reverse MW:18602	18.602	4	4	26.5	26.5	3	25125000	24.5826	2284100	0.112
Mbov_0331	Mbov_0331 Predicted kinase related to dihydroxyacetone kinase 390132:391778 forward MW:60292	60.291	6	6	13	13	5	71601000	26.0935	2237500	0.109
Mbov_0588	deoD purine-nucleoside phosphorylase 695706:696407 forward MW:25731	25.731	4	4	27	27	3	32692000	24.9624	2179500	0.107
Mbov_0826	Mbov_0826 putative transmembrane protein 958224:959645 reverse MW:52844	52.843	3	3	12.3	12.3	4	43095000	25.361	2154700	0.105
Mbov_0157	dnaK molecular chaperone DnaK 178653:180449 forward MW:65284	65.283	11	11	22.4	22.4	10	67932000	26.0176	2122900	0.104
Mbov_0703	clpB Clp protease ATP-binding subunit 834886:837054 forward MW:82501	82.5	10	10	13.6	13.6	10	93173000	26.4734	2117600	0.104
Mbov_0646	gyrA DNA gyrase subunit A 747553:750312 reverse MW:103059	103.06	11	10	12.5	11.9	11	131750000	26.9732	2091200	0.102
Mbov_0105	Mbov_0105 dihydrolipoamide succinyltransferase 114232:114966 forward MW:26812	26.812	4	4	22.5	22.5	6	33458000	24.9958	2091100	0.102
Mbov_0597	rpoA DNA-directed RNA polymerase subunit alpha 703602:704612 reverse MW:37336	37.335	6	6	16.4	16.4	6	52944000	25.658	2036300	0.1
Mbov_0553	Mbov_0553 putative transmembrane protein 652272:652925 reverse MW:24659	24.659	1	1	4.6	4.6	1	19917000	24.2475	1991700	0.097
Mbov_0334	smc chromosome segregation protein 393530:396508 forward MW:111098	111.1	17	17	17	17	14	134110000	26.9988	1972200	0.096
Mbov_0592	Mbov_0592 putative lipoprotein 699345:700397 forward MW:40313	40.313	7	7	21.7	21.7	6	44916000	25.4207	1952900	0.096
Mbov_0802	rnj ribonuclease J 934951:936795 forward MW:69305	69.303	9	9	17.3	17.3	8	83281000	26.3115	1936800	0.095
Mbov_0001	dnaA replication initiation protein 1:1401 forward MW:54154	54.153	4	4	9	9	3	65693000	25.9692	1932200	0.095
Mbov_0842	mgtA Mg2 -importing ATPase 973497:976205 reverse MW:100123	100.12	14	14	17.3	17.3	15	92485000	26.4627	1926800	0.094
Mbov_0160	ldhA D-lactate dehydrogenase 182494:183483 reverse MW:36921	36.92	4	4	11.2	11.2	4	46213000	25.4618	1925500	0.094
Mbov_0631	hupB DNA-binding protein HU-beta 736008:736283 forward MW:10659	10.659	1	1	13.2	13.2	1	9611100	23.1963	1922200	0.094
Mbov_0168	tig trigger factor 190027:191532 reverse MW:57032	57.031	8	8	19.4	19.4	8	66096000	25.9781	1888500	0.092
Mbov_0155	pk pyruvate kinase 175916:177352 forward MW:53584	53.584	5	5	10.3	10.3	5	58193000	25.7943	1877200	0.092
Mbov_0638	Mbov_0638 50S ribosomal protein 741236:741535 reverse MW:10986	10.986	1	1	10.1	10.1	1	13094000	23.6424	1870500	0.092
Mbov_0296	Mbov_0296 putative lipoprotein 344629:346503 reverse MW:70968	70.967	8	8	13.8	13.8	8	78869000	26.233	1834200	0.09
Mbov_0546	Mbov_0546 putative lipoprotein 643011:645233 forward MW:86539	86.538	6	6	8.6	8.6	6	87971000	26.3905	1795300	0.088
Mbov_0812	plsC 1-acyl-sn-glycerol-3-phosphate acyltransferase 946538:947278 reverse MW:28701	28.701	3	3	15	15	3	30433000	24.8591	1790200	0.088
Mbov_0530	Mbov_0530 30S ribosomal protein 625930:626337 forward MW:14920	14.92	1	1	7.4	7.4	0	12563000	23.5827	1794800	0.088
Mbov_0786	nusA transcription elongation factor 918473:920107 reverse MW:61371	61.37	6	6	12.5	12.5	6	61263000	25.8685	1750400	0.086
Mbov_0368	Mbov_0368 putative transmembrane protein 434480:435340 reverse MW:33293	33.293	1	1	4.5	4.5	1	31229000	24.8964	1734900	0.085
Mbov_0091	Mbov_0091 putative transmembrane protein 102638:104005 reverse MW:53546	53.545	6	6	13	13	6	59985000	25.8381	1713900	0.084
Mbov_0327	Mbov_0327 exopolyphosphatase-related proteins 386847:387848 reverse MW:37833	37.833	5	5	16.5	16.5	4	43048000	25.3594	1721900	0.084
Mbov_0332	plsX glycerol-3-phosphate acyltransferase plsX 391785:392789 forward MW:36683	36.683	8	8	23.1	23.1	7	42457000	25.3395	1698300	0.083
Mbov_0627	Mbov_0627 50S ribosomal protein 732782:733222 reverse MW:16662	16.662	2	2	10.3	10.3	1	11751000	23.4863	1678700	0.082
Mbov_0508	atpD ATPase subunit beta 592753:594132 reverse MW:50750	50.75	8	8	19.8	19.8	7	43117000	25.3618	1658300	0.081
Mbov_0071	asnA aspartate ammonia ligase 80040:81020 forward MW:38005	38.005	7	7	23.6	23.6	7	40710000	25.2789	1565800	0.077
Mbov_0555	lepA GTP-binding protein 653811:655604 forward MW:67519	67.518	4	4	8.4	8.4	5	51929000	25.63	1573600	0.077
Mbov_0206	prsA ribose-phosphate pyrophosphokinase 240914:241900 reverse MW:36044	36.043	8	8	29.6	29.6	9	34544000	25.0419	1501900	0.073
Mbov_0819	tyrS tyrosyl-tRNA synthetase 952460:953695 reverse MW:46479	46.479	4	4	10	10	4	36727000	25.1303	1469100	0.072
Mbov_0624	Mbov_0624 50S ribosomal protein 731242:731586 reverse MW:12675	12.676	2	2	15.8	15.8	2	11530000	23.4589	1441200	0.071
Mbov_0471	Mbov_0471 periplasmic protease 550945:552903 forward MW:75084	75.083	3	3	4.8	4.8	3	53085000	25.6618	1397000	0.068
Mbov_0421	trkA trk system potassium uptake protein 490469:491137 forward MW:24187	24.187	2	2	12.2	12.2	2	16397000	23.9669	1366400	0.067
Mbov_0716	Mbov_0716 transcriptional regulators 850047:850913 forward MW:32790	32.79	4	4	14.2	14.2	4	21601000	24.3646	1350100	0.066
Mbov_0335	Mbov_0335 ABC transporter permease protein 396561:397913 reverse MW:50966	50.965	2	2	3.6	3.6	2	31286000	24.899	1303600	0.064
Mbov_0720	sgaH 3-dehydro-L-gulonate-6-phosphate decarboxylase 853011:853664 reverse MW:23899	23.899	2	2	6.5	6.5	2	19366000	24.207	1291100	0.063
Mbov_0533	Mbov_0533 Ca2 -transporting ATPase 628159:630891 forward MW:100233	100.23	9	9	11.6	11.6	8	54545000	25.7009	1268500	0.062
Mbov_0492	Mbov_0492 putative transmembrane protein 575367:576305 reverse MW:35685	35.684	4	4	12.5	12.5	4	22825000	24.4441	1268100	0.062
Mbov_0151	ackA acetate kinase 172051:173244 forward MW:44184	44.183	6	6	18.4	18.4	6	34837000	25.0541	1244200	0.061
Mbov_0695	rpoB DNA-directed RNA polymerase subunit beta 823035:826670 reverse MW:134869	134.87	10	10	9.7	9.7	11	88664000	26.4018	1198200	0.059
Mbov_0596	Mbov_0596 50S ribosomal protein 703237:703602 reverse MW:13785	13.785	2	2	16.5	16.5	2	10911000	23.3793	1212300	0.059
Mbov_0022	Mbov_0022 deoxyguanosine kinase 21303:21965 forward MW:26187	26.187	2	2	8.6	8.6	2	17727000	24.0794	1181800	0.058
Mbov_0441	atpH ATP synthase subunit delta 513098:513658 reverse MW:21397	21.397	1	1	4.8	4.8	1	15544000	23.8899	1195700	0.058
Mbov_0671	Mbov_0671 hypothetical protein 783614:784918 forward MW:50596	50.595	3	3	6	6	3	31310000	24.9001	1159600	0.057
Mbov_0642	hrcA heat-inducible transcriptional repressor 743707:744714 reverse MW:38320	38.319	5	5	17.9	17.9	4	25022000	24.5767	1137400	0.056
Mbov_0028	Mbov_0028 putative transmembrane protein 27637:29613 forward MW:75924	75.923	5	5	6.8	6.8	5	37355000	25.1548	1098700	0.054
Mbov_0433	lon ATP-dependent Lon protease 502923:506054 forward MW:118853	118.85	7	7	8.9	8.9	9	69755000	26.0558	1089900	0.053
Mbov_0687	Mbov_0687 ATP-binding cassette subfamily B 802123:803955 reverse MW:68570	68.569	5	5	11.8	11.8	4	33629000	25.0032	1084800	0.053
Mbov_0702	Mbov_0702 transcriptional accessory protein 832580:834739 forward MW:81762	81.761	7	7	10.4	10.4	7	49905000	25.5727	1061800	0.052
Mbov_0076	pheT phenylalanyl-tRNA synthetase beta chain 88756:90942 forward MW:82369	82.368	10	10	14.8	14.8	9	52303000	25.6404	1046100	0.051
Mbov_0512	Mbov_0512 conserved hypothetical protein 598443:599363 reverse MW:36318	36.317	2	2	5.2	5.2	2	20907000	24.3175	1045300	0.051
Mbov_0620	Mbov_0620 30S ribosomal protein 729701:729967 reverse MW:10113	10.114	1	1	11.4	11.4	1	5173600	22.3027	1034700	0.051
Mbov_0515	Mbov_0515 putative lipoprotein 601403:603970 reverse MW:97562	97.56	10	10	14.2	14.2	9	61351000	25.8706	1022500	0.05
Mbov_0665	srp54 signal recognition particle subunit 778147:779505 reverse MW:50110	50.109	5	5	12.2	12.2	5	36760000	25.1316	1021100	0.05
Mbov_0666	Mbov_0666 predicted acetyltransferase 779524:780348 reverse MW:31659	31.659	4	4	16.1	16.1	3	17285000	24.043	1016700	0.05
Mbov_0451	thrS threonyl-tRNA synthetase 522176:523924 reverse MW:67660	67.659	7	7	11.9	11.9	6	35761000	25.0919	966520	0.047
Mbov_0033	oppF oligopeptide ABC transporter ATP-binding protein 32981:34315 reverse MW:50840	50.84	4	4	9.9	9.9	3	25149000	24.584	931430	0.046
Mbov_0534	Mbov_0534 ABC transporter permease protein 631141:633003 forward MW:70774	70.773	4	4	8.7	8.7	4	29802000	24.8289	931310	0.046
Mbov_0630	Mbov_0630 30S ribosomal protein 735086:735391 reverse MW:11520	11.52	2	2	20.8	20.8	3	7602500	22.858	950310	0.046
Mbov_0535	Mbov_0535 ABC-2 type transporter ATP-binding protein 633006:633710 forward MW:26237	26.237	2	2	10.7	10.7	2	12304000	23.5526	946470	0.046
Mbov_0498	Mbov_0498 putative membrane lipoprotein 580107:580868 reverse MW:28487	28.487	1	1	5.5	5.5	1	3745900	21.8369	936460	0.046
Mbov_0814	engA GTP-binding protein 947776:949086 reverse MW:49605	49.605	6	6	18.6	18.6	4	30270000	24.8514	917270	0.045
Mbov_0617	Mbov_0617 50S ribosomal protein 728442:728987 reverse MW:20764	20.764	2	2	14.4	14.4	2	11860000	23.4996	912290	0.045
Mbov_0320	Mbov_0320 basic amino acid/polyamine antiporter 376301:377971 reverse MW:61423	61.422	2	2	3.4	3.4	2	16390000	23.9663	910580	0.045
Mbov_0127	proS prolyl-tRNA synthetase 140311:141747 forward MW:55062	55.061	3	3	5.6	5.6	3	31374000	24.9031	896410	0.044
Mbov_0101	Mbov_0101 putative transmembrane protein 110848:111537 reverse MW:26878	26.878	2	2	7.9	7.9	2	9980500	23.2507	907310	0.044
Mbov_0565	ldh L-lactate dehydrogenase 667109:668080 reverse MW:35014	35.014	3	3	11.1	11.1	3	20527000	24.291	855310	0.042
Mbov_0499	asnS asparaginyl-tRNA synthetase 581232:582590 forward MW:51779	51.779	5	5	10.6	10.6	4	26907000	24.6815	840840	0.041
Mbov_0077	glyA serine hydroxymethyltransferase 90952:92217 forward MW:46262	46.261	2	2	7.1	7.1	2	18625000	24.1507	846590	0.041
Mbov_0038	Mbov_0038 putative transmembrane protein 41009:50989 reverse MW:380078	380.07	20	20	6.6	6.6	18	176750000	27.3971	807060	0.039
Mbov_0677	Mbov_0677 30S ribosomal protein 793009:793479 reverse MW:17850	17.85	2	2	15.4	15.4	1	9485600	23.1773	790470	0.039
Mbov_0118	Mbov_0118 putative transmembrane protein 131049:132266 forward MW:45757	45.756	1	1	3	3	1	8803800	23.0697	800350	0.039
Mbov_0500	Mbov_0500 glycosyltransferase 582600:583604 forward MW:39649	39.648	2	2	5.1	5.1	2	18624000	24.1507	716330	0.035
Mbov_0789	pepA leucyl aminopeptidase 921349:922719 reverse MW:50236	50.235	5	5	12.3	12.3	4	24616000	24.5531	703310	0.034
Mbov_0428	pepO endopeptidase O 496525:498471 forward MW:74785	74.785	6	6	10.5	10.5	6	26704000	24.6706	667590	0.033
Mbov_0029	Mbov_0029 ABC-type multidrug transport system ATPase component 29613:30635 forward MW:38818	38.817	3	3	9.1	9.1	3	15553000	23.8907	676210	0.033
Mbov_0700	lysS lysyl-tRNA synthetase 830022:831491 reverse MW:56437	56.436	3	3	4.5	4.5	3	18989000	24.1787	632970	0.031
Mbov_0110	Mbov_0110 putative transmembrane protein 119121:120029 reverse MW:35203	35.202	2	2	7.6	7.6	3	9643800	23.2012	642920	0.031
Mbov_0742	Mbov_0742 glycerol ABC transporter ATP binding component 875189:876412 reverse MW:46867	46.866	2	2	5.2	5.2	2	15887000	23.9213	635490	0.031
Mbov_0109	Mbov_0109 monophosphate biosynthesis 118559:119104 reverse MW:20236	20.236	2	2	15.5	15.5	2	6902100	22.7186	627470	0.031
Mbov_0804	Mbov_0804 conserved hypothetical protein 938175:940688 forward MW:97776	97.774	2	2	2	2	1	31641000	24.9153	620410	0.03
Mbov_0832	trxA thioredoxin 964894:965208 forward MW:12126	12.127	2	2	22.1	22.1	2	5522100	22.3968	613560	0.03
Mbov_0043	cysS cysteinyl-tRNA synthetase 52724:53965 forward MW:48222	48.221	3	3	6.3	6.3	2	17378000	24.0508	599230	0.029
Mbov_0134	potA spermidine/putrescine ABC transporter ATP-binding protein 151054:152466 forward MW:54899	54.898	3	3	7	7	3	18232000	24.12	588130	0.029
Mbov_0301	Mbov_0301 conserved hypothetical protein 352871:353656 reverse MW:30428	30.428	2	2	5.7	5.7	2	10638000	23.3427	591000	0.029
Mbov_0267	Mbov_0267 conserved hypothetical protein 307290:308132 forward MW:32083	32.082	2	2	6.4	6.4	2	11190000	23.4157	588970	0.029
Mbov_0482	Mbov_0482 enolase 562968:564332 forward MW:49369	49.369	3	3	10.6	10.6	1	16061000	23.9371	573600	0.028
Mbov_0587	Mbov_0587 predicted hydrolases of the HAD superfamily 694596:695420 reverse MW:32097	32.096	2	2	11.7	11.7	2	9883800	23.2366	581400	0.028
Mbov_0037	oppA oligopeptide ABC transporter substrate-binding protein 38044:40998 reverse MW:113303	113.3	7	7	7.5	7.5	8	31686000	24.9173	546310	0.027
Mbov_0590	deoC deoxyribose-phosphate aldolase 697731:698399 forward MW:24322	24.322	2	2	9.5	9.5	1	9213700	23.1353	541980	0.027
Mbov_0490	Mbov_0490 ATP-binding cassette subfamily B 571594:573390 forward MW:67803	67.802	3	3	4.5	4.5	4	19375000	24.2077	538200	0.026
Mbov_0795	Mbov_0795 variable surface lipoprotein VspHB0801-3 927589:928215 reverse MW:22002	22.002	1	1	9.1	9.1	1	11798000	23.492	536290	0.026
Mbov_0255	Mbov_0255 CTP synthetase 290310:291929 forward MW:60404	60.403	4	4	8.5	8.5	3	15940000	23.9261	514190	0.025
Mbov_0322	aspS aspartyl-tRNA synthetase 379595:381298 forward MW:65951	65.95	5	5	10.8	10.8	5	19013000	24.1805	487510	0.024
Mbov_0788	tdk thymidine kinase 920701:921273 reverse MW:21439	21.439	1	1	7.9	7.9	1	5505200	22.3924	500470	0.024
Mbov_0843	Mbov_0843 ABC transporter ATP-binding protein 976326:977414 reverse MW:41162	41.162	3	3	13	13	4	9705300	23.2103	462160	0.023
Mbov_0437	atpC ATP synthase subunit epsilon 508718:509131 reverse MW:15250	15.25	2	2	21.2	21.2	2	4681000	22.1584	468100	0.023
Mbov_0125	era GTP-binding protein 138238:139110 forward MW:32851	32.851	1	1	4.8	4.8	1	9104200	23.1181	479170	0.023
Mbov_0591	tpiA triosephosphate isomerase 698444:699226 reverse MW:29433	29.433	1	1	5	5	1	5842000	22.478	449390	0.022
Mbov_0200	Mbov_0200 predicted hydrolases of the HAD superfamily 235684:236613 forward MW:34666	34.666	2	2	9.1	9.1	2	8700200	23.0526	435010	0.021
Mbov_0083	rluB ribosomal large subunit pseudouridine synthase B 97094:97861 forward MW:29225	29.225	2	2	8.6	8.6	1	7215100	22.7826	424420	0.021
Mbov_0147	Mbov_0147 hypothetical protein 165065:167500 forward MW:95163	95.161	6	6	6.5	6.5	4	21965000	24.3887	414430	0.02
Mbov_0725	Mbov_0725 predicted hydrolases of the HAD superfamily 857812:858669 forward MW:32905	32.904	2	2	7.7	7.7	2	8519300	23.0223	405680	0.02
Mbov_0002	dnaN DNA polymerase III subunit beta 1535:2644 forward MW:42431	42.43	1	1	3.3	3.3	1	10808000	23.3656	415700	0.02
Mbov_0714	Mbov_0714 predicted integral membrane protein 845243:848215 forward MW:113773	113.77	6	6	6	6	5	20397000	24.2819	384850	0.019
Mbov_0831	gyrB DNA gyrase subunit B 962804:964771 forward MW:73519	73.517	3	3	4.3	4.3	3	14108000	23.75	381290	0.019
Mbov_0096	Mbov_0096 predicted GTPases 106465:107325 forward MW:32752	32.752	2	2	4.9	4.9	2	7671200	22.871	383560	0.019
Mbov_0779	Mbov_0779 putative transmembrane protein 912931:913464 forward MW:20751	20.751	1	1	7.9	7.9	1	4242800	22.0166	385710	0.019
Mbov_0133	pepF oligoendopeptidase 148951:150792 reverse MW:72227	72.226	3	3	6.4	6.4	3	14607000	23.8002	365170	0.018
Mbov_0741	Mbov_0741 glycerol ABC transporter permease component 874222:875196 reverse MW:37533	37.532	1	1	3.4	3.4	1	5166000	22.3006	369000	0.018
Mbov_0197	Mbov_0197 putative transmembrane protein 229516:230913 forward MW:52074	52.073	1	1	2.8	2.8	1	8840200	23.0756	340010	0.017
Mbov_0148	valS valyl-tRNA synthetase 167639:170128 forward MW:96856	96.854	6	6	7.5	7.5	3	16254000	23.9543	306680	0.015
Mbov_0313	topA DNA topoisomerase I 369280:371118 reverse MW:69961	69.96	5	5	8.5	8.5	4	12024000	23.5194	300590	0.015
Mbov_0503	Mbov_0503 putative transmembrane protein 586518:588164 forward MW:64707	64.706	3	3	4.2	4.2	2	9208100	23.1345	297040	0.015
Mbov_0694	rpoC DNA-directed RNA polymerase subunit beta 818606:823042 reverse MW:167146	167.14	9	9	6.7	6.7	8	29682000	24.8231	291000	0.014
Mbov_0228	rnr ribonuclease R 259581:261770 reverse MW:83874	83.873	4	4	5.3	5.3	4	16029000	23.9342	286240	0.014
Mbov_0121	Mbov_0121 ATP-binding cassette subfamily C 134920:136977 forward MW:79003	79.002	1	1	1.3	1.3	1	11200000	23.417	294740	0.014
Mbov_0519	Mbov_0519 putative transmembrane protein 611335:613545 reverse MW:83390	83.389	5	5	7.7	7.7	5	11726000	23.4832	266490	0.013
Mbov_0035	oppC oligopeptide ABC transporter permease protein 35935:36948 reverse MW:38427	38.426	1	1	3.3	3.3	1	4104100	21.9686	256500	0.013
Mbov_0668	pncB nicotinate phosphoribosyltransferase 780836:781837 reverse MW:37473	37.473	1	1	3.9	3.9	1	4099800	21.9671	256240	0.013
Mbov_0517	Mbov_0517 putative transmembrane protein 606432:608657 reverse MW:83988	83.986	7	7	10.3	10.3	8	12110000	23.5297	242190	0.012
Mbov_0502	uvrD ATP-dependent DNA helicase 584299:586503 forward MW:84932	84.93	3	3	4.1	4.1	2	12251000	23.5464	235590	0.012
Mbov_0279	Mbov_0279 hemolysin-related protein 320731:322023 forward MW:49284	49.283	1	1	2.8	2.8	0	4450300	22.0855	247240	0.012
Mbov_0663	metK S-adenosylmethionine synthetase 775800:776948 reverse MW:42226	42.226	1	1	2.6	2.6	1	5392700	22.3626	245120	0.012
Mbov_0719	sgaU L-ribulose-5-phosphate 3-epimerase 852152:853036 reverse MW:34377	34.377	1	1	3.1	3.1	0	5015000	22.2578	227950	0.011
Mbov_0304	glyS1 glycyl-tRNA synthetase 357165:358541 reverse MW:52872	52.872	2	2	4.1	4.1	2	5751800	22.4556	205420	0.01
Mbov_0218	Mbov_0218 HIT-like protein 253210:253545 forward MW:12611	12.611	1	1	16.2	16.2	1	1873200	20.8371	208130	0.01
Mbov_0484	pgi glucose-6-phosphate isomerase 564816:566066 forward MW:49199	49.199	1	1	2.2	2.2	1	3929800	21.906	206830	0.01
Mbov_0552	Mbov_0552 ATP-binding protein 648634:652053 reverse MW:131758	131.76	2	2	1.6	1.6	2	12080000	23.5261	177650	0.009
Mbov_0256	ileS isoleucyl-tRNA synthetase 292169:294835 forward MW:102641	102.64	2	2	2.8	2.8	2	9289900	23.1472	175280	0.009
Mbov_0790	Mbov_0790 transposase ISMbov1 922930:924180 forward MW:48558	48.557	1	1	1.9	1.9	1	5815600	22.4715	181740	0.009
Mbov_0411	uvrA excinuclease ABC subunit A 477083:479914 reverse MW:105491	105.49	4	4	3.3	3.3	3	10397000	23.3097	159950	0.008
Mbov_0276	Mbov_0276 predicted signaling protein 316830:318830 forward MW:75087	75.086	2	2	1.7	1.7	1	6038500	22.5258	154830	0.008
Mbov_0026	Mbov_0026 ribokinase family sugar kinases 25710:26609 reverse MW:32649	32.648	1	1	6.7	6.7	1	2619200	21.3207	163700	0.008
Mbov_0529	Mbov_0529 50S ribosomal protein 625494:625928 forward MW:16154	16.154	1	1	9	9	1	1604500	20.6137	160450	0.008
Mbov_0244	hsdM type I restriction enzyme M protein 279681:281321 forward MW:62416	62.415	1	1	2	2	1	4883600	22.2195	157540	0.008
Mbov_0650	hsdR type I restriction enzyme R subunit 757346:760543 reverse MW:123746	123.74	3	3	2.4	2.4	2	9907100	23.24	133880	0.007
Mbov_0241	Mbov_0241 AAA family ATPase 272994:274037 forward MW:39892	39.891	2	2	6.9	6.9	2	2959100	21.4967	147950	0.007
Mbov_0715	ptsI phosphotransferase system enzyme I 848290:850002 reverse MW:63689	63.688	2	2	3.7	3.7	0	4668900	22.1547	145900	0.007
Mbov_0556	Mbov_0556 predicted choline kinase involved in LPS biosynthesis 655680:657131 forward MW:57538	57.537	2	2	3.3	3.3	2	4494300	22.0997	144980	0.007
Mbov_0848	recD exodeoxyribonuclease V alpha subunit 989249:991519 reverse MW:87224	87.222	2	2	2.9	2.9	2	6990300	22.7369	139810	0.007
Mbov_0199	parC topoisomerase IV subunit A 232957:235542 forward MW:97669	97.668	2	2	1.6	1.6	2	7284700	22.7964	137450	0.007
Mbov_0238	recD exodeoxyribonuclease V alpha subunit 268717:270942 reverse MW:85184	85.183	2	2	2.7	2.7	1	6713600	22.6787	137010	0.007
Mbov_0082	nadD nicotinate-nucleotide adenylyltransferase 96012:97106 forward MW:42155	42.155	1	1	3.6	3.6	1	4117700	21.9734	152510	0.007
Mbov_0295	ef-Ts elongation factor 343699:344595 forward MW:32607	32.607	1	1	5	5	0	2742500	21.3871	152360	0.007
Mbov_0836	Mbov_0836 transposase ISMbov3 966978:968651 forward MW:65685	65.684	1	1	1.4	1.4	1	5170400	22.3018	152070	0.007
Mbov_0573	Mbov_0573 predicted hydrolases of the HAD superfamily 677599:678435 forward MW:31506	31.506	1	1	4	4	1	2573400	21.2952	142970	0.007
Mbov_0404	hpt hypoxanthine phosphoribosyltransferase 473121:473672 forward MW:20714	20.714	1	1	3.8	3.8	1	1921500	20.8738	137250	0.007
Mbov_0797	Mbov_0797 variable surface lipoprotein VspHB0801-5 929969:930928 forward MW:34601	34.601	1	1	5.6	5.6	1	3956400	21.9158	123640	0.006
Mbov_0072	polC DNA polymerase III subunit alpha 81145:85521 forward MW:166605	166.6	3	3	2.3	2.3	3	8834500	23.0747	94995	0.005
Mbov_0011	Mbov_0011 trimethylamine dehydrogenase 11130:11999 reverse MW:34083	34.083	2	2	10	10	1	2046300	20.9646	107700	0.005
Mbov_0774	dnaX DNA polymerase III subunit gamma/tau 906501:908351 reverse MW:70290	70.289	2	2	3.4	3.4	1	3871000	21.8843	99258	0.005
Mbov_0432	leuS leucyl-tRNA synthetase 500506:502845 forward MW:90238	90.237	2	2	2.8	2.8	2	5082500	22.2771	95897	0.005
Mbov_0749	Mbov_0749 methyltransferases 884044:885366 reverse MW:50711	50.71	1	1	2.5	2.5	1	3056800	21.5436	98605	0.005
Mbov_0243	hsdR type I restriction enzyme R subunit 276539:279679 forward MW:122362	122.36	3	3	3	3	2	5906900	22.494	88163	0.004
Mbov_0325	glpK glycerol kinase 383525:385033 reverse MW:56560	56.56	1	1	3	3	1	2187600	21.0609	62503	0.003
Mbov_0647	Mbov_0647 superfamily I DNA and RNA helicases 750936:755648 forward MW:183314	183.31	2	2	1.4	1.4	2	4362200	22.0566	40391	0.002
Mbov_0371	alaS alanyl-tRNA synthetase 437547:440189 forward MW:100470	100.47	1	1	1.4	1.4	1	2564500	21.2902	40707	0.002
Mbov_0239	Mbov_0239 transposase ISMbov4 271088:272521 reverse MW:55988	55.987	1	1	2.1	2.1	1	1248500	20.2518	37833	0.002
Mbov_0184	Mbov_0184 transposase ISMbov2 214824:216095 forward MW:50115	50.114	1	1	2.6	2.6	1	844700	19.6881	30168	0.001
Mbov_0081	dinB DNA polymerase IV 94759:96006 forward MW:47611	47.61	1	1	2.4	2.4	0	0	NA	0	0
Mbov_0247	hsdS type I restriction enzyme S subunit 282727:283902 forward MW:44928	44.928	1	1	1.5	1.5	0	0	NA	0	0
Mbov_0429	ssb single-strand DNA-binding protein 498481:499041 forward MW:21067	21.067	1	1	6.5	6.5	0	0	NA	0	0
Mbov_0667	Mbov_0667 hypothetical protein 780420:780659 reverse MW:8986	8.986	1	1	16.5	16.5	0	0	NA	0	0
Mbov_0673	pepA leucyl aminopeptidase 785918:787279 reverse MW:50693	50.693	1	1	3.3	3.3	1	0	NA	0	0
Mbov_0751	Mbov_0751 conserved hypothetical protein 886317:887324 reverse MW:38758	38.758	1	1	2.1	2.1	0	0	NA	0	0
Mbov_0759	rnhB ribonuclease HII 894726:895349 reverse MW:23785	23.785	1	1	4.8	4.8	1	0	NA	0	0
